# Supplementary material
Source: publisher figshare collection journal article supplement (https://tandf.figshare.com/articles/dataset/_/11674152)
Supplement: Supplementary file 1 [file 2 › Appendix A.pdf]

## **Appendix A**

### **Interview Guide**

#### **Introductory question**

1. Introduce yourself
  - Course/year of the undergraduate programme
  - Years of experience as course coordinator

#### **Transition question**

1. Describe how you, as the course coordinator, collaborate with students to improve education.

#### **Student-staff partnership**

Students and teachers designing or redesigning education together by contributing equally to decision-making and course improvement processes. In doing so, students and teachers respect each other and are equal partners, although their input may differ.

#### **Key questions**

1. What do you think of this idea? Why is it a good idea/why not?
2. How do you currently involve students in decision-making processes related to educational improvement and how do you involve students in facilitating implementation processes?
3. What do you see as advantages and disadvantages of student-staff partnerships?
4. What do you need to involve students in decision-making processes and in the creation of education?

5. What do students need before they can be involved in decision-making processes and in the creation of education?

**Students' perceived prerequisites for student-staff partnerships known to date**

- Reciprocal respect
- Influence/autonomy (empowerment)
- Commitment
- Communication
- Prior experience

6. What do you think of this definition?
7. How can we reach this?/ How did you reach this?

**Wrap-up question**

1. Do you want to discuss a topic that we have not discussed yet?
