# Supplementary material
Source: publisher figshare collection journal article supplement (https://tandf.figshare.com/articles/dataset/_/11674152)
Supplement: Supplementary file 1 [file 2 › Appendix B.pdf]

## **Appendix B**

Vignettes or definitions of students' perceived prerequisites for student-staff partnerships known to date.

### **Partnership**

Students and teachers designing or redesigning education together by contributing equally to decision-making and course improvement processes. In doing so, students and teachers respect each other and are equal partners, although their input may differ.

### **Reciprocal respect**

Taking each other seriously, appreciating each other and exchanging thoughts in an equal way during decision-making processes.

### **Influence/autonomy**

Being able to actually contribute to educational improvement processes and being free to decide on how to contribute.

### **Commitment**

Willing to put extra effort into improving education and being concerned about the quality.

### **Communication**

Ensuring that all mutual expectations are clear.

### **Prior experience**

The need to have experienced a course before being able to make a relevant contribution to its improvement.
